# Supplementary material
Source: publisher figshare collection journal article supplement (https://acs.figshare.com/ndownloader/files/5168911)
Supplement: Supplementary file 1 [file 5168911]

data_26feb
 
_audit_creation_method            SHELXL-97
_chemical_name_systematic
;
 ?
;
_chemical_name_common             ?
_chemical_melting_point           ?
_chemical_formula_moiety          ?
_chemical_formula_sum
 'C26 H24 Br4 O6'
_chemical_formula_weight          752.09
 
loop_
 _atom_type_symbol
 _atom_type_description
 _atom_type_scat_dispersion_real
 _atom_type_scat_dispersion_imag
 _atom_type_scat_source
 'C'  'C'   0.0033   0.0016
 'International Tables Vol C Tables 4.2.6.8 and 6.1.1.4'
 'H'  'H'   0.0000   0.0000
 'International Tables Vol C Tables 4.2.6.8 and 6.1.1.4'
 'O'  'O'   0.0106   0.0060
 'International Tables Vol C Tables 4.2.6.8 and 6.1.1.4'
 'Br'  'Br'  -0.2901   2.4595
 'International Tables Vol C Tables 4.2.6.8 and 6.1.1.4'
 
_symmetry_cell_setting            ?
_symmetry_space_group_name_H-M    ?
 
loop_
 _symmetry_equiv_pos_as_xyz
 'x, y, z'
 '-x+1/2, y, -z'
 'x+1/2, y+1/2, z+1/2'
 '-x+1, y+1/2, -z+1/2'
 '-x, -y, -z'
 'x-1/2, -y, z'
 '-x+1/2, -y+1/2, -z+1/2'
 'x, -y+1/2, z+1/2'
 
_cell_length_a                    9.788(5)
_cell_length_b                    11.371(5)
_cell_length_c                    24.734(5)
_cell_angle_alpha                 90.000(5)
_cell_angle_beta                  95.939(5)
_cell_angle_gamma                 90.000(5)
_cell_volume                      2738.1(19)
_cell_formula_units_Z             4
_cell_measurement_temperature     293(2)
_cell_measurement_reflns_used     ?
_cell_measurement_theta_min       ?
_cell_measurement_theta_max       ?
 
_exptl_crystal_description        ?
_exptl_crystal_colour             ?
_exptl_crystal_size_max           ?
_exptl_crystal_size_mid           ?
_exptl_crystal_size_min           ?
_exptl_crystal_density_meas       ?
_exptl_crystal_density_diffrn     1.824
_exptl_crystal_density_method     'not measured'
_exptl_crystal_F_000              1472
_exptl_absorpt_coefficient_mu     5.918
_exptl_absorpt_correction_type    none
_exptl_absorpt_correction_T_min   ?
_exptl_absorpt_correction_T_max   ?
_exptl_absorpt_process_details    ?
 
_exptl_special_details
;
 ?
;
 
_diffrn_ambient_temperature       293(2)
_diffrn_radiation_wavelength      0.71069
_diffrn_radiation_type            MoK\a
_diffrn_radiation_source          'fine-focus sealed tube'
_diffrn_radiation_monochromator   graphite
_diffrn_measurement_device_type   ?
_diffrn_measurement_method        ?
_diffrn_detector_area_resol_mean  ?
_diffrn_standards_number          ?
_diffrn_standards_interval_count  ?
_diffrn_standards_interval_time   ?
_diffrn_standards_decay_%         ?
_diffrn_reflns_number             3714
_diffrn_reflns_av_R_equivalents   0.2883
_diffrn_reflns_av_sigmaI/netI     0.3540
_diffrn_reflns_limit_h_min        0
_diffrn_reflns_limit_h_max        10
_diffrn_reflns_limit_k_min        -12
_diffrn_reflns_limit_k_max        12
_diffrn_reflns_limit_l_min        -26
_diffrn_reflns_limit_l_max        26
_diffrn_reflns_theta_min          1.97
_diffrn_reflns_theta_max          22.54
_reflns_number_total              1794
_reflns_number_gt                 705
_reflns_threshold_expression      >2sigma(I)
 
_computing_data_collection        ?
_computing_cell_refinement        ?
_computing_data_reduction         ?
_computing_structure_solution     ?
_computing_structure_refinement   'SHELXL-97 (Sheldrick, 1997)'
_computing_molecular_graphics     ?
_computing_publication_material   ?
 
_refine_special_details
;
 Refinement of F^2^ against ALL reflections.  The weighted R-factor wR and
 goodness of fit S are based on F^2^, conventional R-factors R are based
 on F, with F set to zero for negative F^2^. The threshold expression of
 F^2^ > 2sigma(F^2^) is used only for calculating R-factors(gt) etc. and is
 not relevant to the choice of reflections for refinement.  R-factors based
 on F^2^ are statistically about twice as large as those based on F, and R-
 factors based on ALL data will be even larger.
;
 
_refine_ls_structure_factor_coef  Fsqd
_refine_ls_matrix_type            full
_refine_ls_weighting_scheme       calc
_refine_ls_weighting_details
 'calc w=1/[\s^2^(Fo^2^)+(0.0439P)^2^+0.0000P] where P=(Fo^2^+2Fc^2^)/3'
_atom_sites_solution_primary      direct
_atom_sites_solution_secondary    difmap
_atom_sites_solution_hydrogens    geom
_refine_ls_hydrogen_treatment     mixed
_refine_ls_extinction_method      SHELXL
_refine_ls_extinction_coef        0.0002(2)
_refine_ls_extinction_expression
 'Fc^*^=kFc[1+0.001xFc^2^\l^3^/sin(2\q)]^-1/4^'
_refine_ls_number_reflns          1794
_refine_ls_number_parameters      154
_refine_ls_number_restraints      0
_refine_ls_R_factor_all           0.2407
_refine_ls_R_factor_gt            0.0596
_refine_ls_wR_factor_ref          0.1453
_refine_ls_wR_factor_gt           0.1099
_refine_ls_goodness_of_fit_ref    0.943
_refine_ls_restrained_S_all       0.943
_refine_ls_shift/su_max           0.000
_refine_ls_shift/su_mean          0.000
 
loop_
 _atom_site_label
 _atom_site_type_symbol
 _atom_site_fract_x
 _atom_site_fract_y
 _atom_site_fract_z
 _atom_site_U_iso_or_equiv
 _atom_site_adp_type
 _atom_site_occupancy
 _atom_site_symmetry_multiplicity
 _atom_site_calc_flag
 _atom_site_refinement_flags
 _atom_site_disorder_assembly
 _atom_site_disorder_group
C1 C 0.3522(13) 0.2904(11) 0.3395(6) 0.021(4) Uani 1 1 d . . .
C2 C 0.2452(14) 0.2701(12) 0.3651(6) 0.025(4) Uiso 1 1 d . . .
C3 C 0.2784(15) 0.1878(12) 0.4116(6) 0.033(4) Uani 1 1 d . . .
H3 H 0.2017 0.1453 0.4251 0.040 Uiso 1 1 calc R . .
C4 C 0.3859(14) 0.1143(12) 0.3845(6) 0.023(4) Uiso 1 1 d . . .
C5 C 0.4741(13) 0.2193(12) 0.3681(6) 0.026(4) Uani 1 1 d . . .
C6 C 0.5080(16) 0.2721(13) 0.4267(6) 0.033(4) Uani 1 1 d . . .
H6 H 0.5746 0.2185 0.4460 0.040 Uiso 1 1 calc R . .
C7 C 0.3749(15) 0.2596(14) 0.4541(6) 0.039(5) Uani 1 1 d . . .
H7A H 0.3358 0.3360 0.4607 0.046 Uiso 1 1 calc R . .
H7B H 0.3912 0.2174 0.4882 0.046 Uiso 1 1 calc R . .
C8 C 0.6002(13) 0.2076(11) 0.3392(7) 0.039(5) Uani 1 1 d . . .
H8A H 0.5741 0.1862 0.3016 0.046 Uiso 1 1 calc R . .
H8B H 0.6579 0.1455 0.3559 0.046 Uiso 1 1 calc R . .
C10 C 0.7060(15) 0.3763(13) 0.3983(6) 0.039(5) Uani 1 1 d . . .
H10A H 0.7681 0.3251 0.4205 0.047 Uiso 1 1 calc R . .
H10B H 0.7510 0.4519 0.3960 0.047 Uiso 1 1 calc R . .
C9 C 0.6818(14) 0.3244(15) 0.3415(7) 0.049(5) Uani 1 1 d . . .
H9A H 0.7699 0.3107 0.3279 0.059 Uiso 1 1 calc R . .
H9B H 0.6321 0.3811 0.3177 0.059 Uiso 1 1 calc R . .
C11 C 0.5801(15) 0.3926(13) 0.4257(6) 0.036(5) Uani 1 1 d . . .
H11 H 0.5192 0.4475 0.4042 0.043 Uiso 1 1 calc R . .
C16 C 0.4018(14) -0.0156(12) 0.3095(6) 0.039(4) Uani 1 1 d . . .
H14A H 0.3456 -0.0606 0.2829 0.058 Uiso 1 1 calc R . .
H14B H 0.4622 -0.0674 0.3313 0.058 Uiso 1 1 calc R . .
H14C H 0.4550 0.0401 0.2914 0.058 Uiso 1 1 calc R . .
C14 C 0.3943(16) -0.0586(14) 0.4417(6) 0.052(5) Uani 1 1 d . . .
H16A H 0.4581 -0.1047 0.4650 0.078 Uiso 1 1 calc R . .
H16B H 0.3534 -0.1069 0.4125 0.078 Uiso 1 1 calc R . .
H16C H 0.3238 -0.0288 0.4623 0.078 Uiso 1 1 calc R . .
O12 O 0.6046(10) 0.4363(9) 0.4794(4) 0.048(3) Uani 1 1 d . . .
H12 H 0.6876 0.4436 0.4875 0.071 Uiso 1 1 calc R . .
O15 O 0.3173(9) 0.0446(8) 0.3430(4) 0.030(3) Uani 1 1 d . . .
O13 O 0.4664(10) 0.0394(8) 0.4194(4) 0.038(3) Uani 1 1 d . . .
Br2 Br 0.3598(2) 0.38543(15) 0.27967(8) 0.0473(7) Uani 1 1 d . . .
Br1 Br 0.06786(16) 0.32886(16) 0.34826(8) 0.0530(7) Uani 1 1 d . . .
 
loop_
 _atom_site_aniso_label
 _atom_site_aniso_U_11
 _atom_site_aniso_U_22
 _atom_site_aniso_U_33
 _atom_site_aniso_U_23
 _atom_site_aniso_U_13
 _atom_site_aniso_U_12
C1 0.022(9) 0.023(10) 0.019(10) -0.008(7) 0.006(7) 0.005(7)
C3 0.028(9) 0.034(10) 0.037(11) -0.016(9) 0.000(8) -0.008(8)
C5 0.012(8) 0.038(10) 0.029(11) 0.009(8) 0.004(8) 0.004(7)
C6 0.044(11) 0.024(10) 0.028(11) 0.013(8) -0.015(9) 0.008(9)
C7 0.042(11) 0.035(11) 0.036(12) 0.000(9) -0.009(10) -0.010(9)
C8 0.027(10) 0.014(10) 0.072(14) 0.000(8) -0.008(10) 0.008(7)
C10 0.036(10) 0.046(12) 0.034(11) 0.012(10) 0.000(9) -0.010(8)
C9 0.028(9) 0.075(13) 0.048(12) -0.018(11) 0.017(9) -0.015(10)
C11 0.038(10) 0.021(10) 0.050(13) 0.018(10) 0.009(10) 0.003(8)
C16 0.036(10) 0.036(11) 0.042(11) -0.004(9) -0.005(9) -0.004(9)
C14 0.059(12) 0.042(11) 0.051(13) 0.021(10) -0.009(10) -0.018(10)
O12 0.043(7) 0.066(8) 0.029(7) -0.019(6) -0.017(6) -0.011(6)
O15 0.036(6) 0.020(6) 0.035(7) -0.014(5) 0.007(6) 0.006(5)
O13 0.049(7) 0.023(7) 0.044(7) 0.004(6) 0.002(6) 0.000(6)
Br2 0.0474(12) 0.0468(12) 0.0455(12) 0.0191(10) -0.0062(9) -0.0017(9)
Br1 0.0264(10) 0.0413(12) 0.0890(17) -0.0087(12) -0.0055(10) 0.0068(10)
 
_geom_special_details
;
 All esds (except the esd in the dihedral angle between two l.s. planes)
 are estimated using the full covariance matrix.  The cell esds are taken
 into account individually in the estimation of esds in distances, angles
 and torsion angles; correlations between esds in cell parameters are only
 used when they are defined by crystal symmetry.  An approximate (isotropic)
 treatment of cell esds is used for estimating esds involving l.s. planes.
;
 
loop_
 _geom_bond_atom_site_label_1
 _geom_bond_atom_site_label_2
 _geom_bond_distance
 _geom_bond_site_symmetry_2
 _geom_bond_publ_flag
C1 C2 1.299(17) . ?
C1 C5 1.551(17) . ?
C1 Br2 1.841(13) . ?
C2 C3 1.491(18) . ?
C2 Br1 1.867(14) . ?
C3 C4 1.550(18) . ?
C3 C7 1.567(18) . ?
C4 O13 1.398(15) . ?
C4 O15 1.409(15) . ?
C4 C5 1.551(18) . ?
C5 C8 1.495(17) . ?
C5 C6 1.571(19) . ?
C6 C7 1.536(18) . ?
C6 C11 1.543(19) . ?
C8 C9 1.548(18) . ?
C10 C11 1.478(19) . ?
C10 C9 1.519(19) . ?
C11 O12 1.415(16) . ?
C16 O15 1.408(15) . ?
C14 O13 1.458(15) . ?
 
loop_
 _geom_angle_atom_site_label_1
 _geom_angle_atom_site_label_2
 _geom_angle_atom_site_label_3
 _geom_angle
 _geom_angle_site_symmetry_1
 _geom_angle_site_symmetry_3
 _geom_angle_publ_flag
C2 C1 C5 107.8(12) . . ?
C2 C1 Br2 126.8(11) . . ?
C5 C1 Br2 125.4(9) . . ?
C1 C2 C3 111.4(13) . . ?
C1 C2 Br1 127.2(12) . . ?
C3 C2 Br1 121.3(11) . . ?
C2 C3 C4 96.2(11) . . ?
C2 C3 C7 105.0(12) . . ?
C4 C3 C7 100.5(12) . . ?
O13 C4 O15 107.7(11) . . ?
O13 C4 C3 115.2(12) . . ?
O15 C4 C3 108.9(11) . . ?
O13 C4 C5 109.7(11) . . ?
O15 C4 C5 118.6(12) . . ?
C3 C4 C5 96.8(11) . . ?
C8 C5 C1 117.5(12) . . ?
C8 C5 C4 124.5(12) . . ?
C1 C5 C4 95.6(10) . . ?
C8 C5 C6 111.6(12) . . ?
C1 C5 C6 107.5(11) . . ?
C4 C5 C6 97.1(11) . . ?
C7 C6 C11 120.0(13) . . ?
C7 C6 C5 105.3(12) . . ?
C11 C6 C5 112.3(12) . . ?
C6 C7 C3 103.5(12) . . ?
C5 C8 C9 110.8(12) . . ?
C11 C10 C9 114.5(12) . . ?
C10 C9 C8 113.4(13) . . ?
O12 C11 C10 114.0(13) . . ?
O12 C11 C6 109.3(12) . . ?
C10 C11 C6 107.4(13) . . ?
C16 O15 C4 115.9(10) . . ?
C4 O13 C14 115.8(11) . . ?
 
loop_
 _geom_torsion_atom_site_label_1
 _geom_torsion_atom_site_label_2
 _geom_torsion_atom_site_label_3
 _geom_torsion_atom_site_label_4
 _geom_torsion
 _geom_torsion_site_symmetry_1
 _geom_torsion_site_symmetry_2
 _geom_torsion_site_symmetry_3
 _geom_torsion_site_symmetry_4
 _geom_torsion_publ_flag
C5 C1 C2 C3 0.1(16) . . . . ?
Br2 C1 C2 C3 179.7(10) . . . . ?
C5 C1 C2 Br1 -178.5(10) . . . . ?
Br2 C1 C2 Br1 1.1(19) . . . . ?
C1 C2 C3 C4 -33.5(14) . . . . ?
Br1 C2 C3 C4 145.2(10) . . . . ?
C1 C2 C3 C7 69.1(15) . . . . ?
Br1 C2 C3 C7 -112.2(12) . . . . ?
C2 C3 C4 O13 167.1(12) . . . . ?
C7 C3 C4 O13 60.6(15) . . . . ?
C2 C3 C4 O15 -71.8(13) . . . . ?
C7 C3 C4 O15 -178.3(11) . . . . ?
C2 C3 C4 C5 51.6(12) . . . . ?
C7 C3 C4 C5 -54.9(12) . . . . ?
C2 C1 C5 C8 167.1(12) . . . . ?
Br2 C1 C5 C8 -12.5(18) . . . . ?
C2 C1 C5 C4 33.3(14) . . . . ?
Br2 C1 C5 C4 -146.4(10) . . . . ?
C2 C1 C5 C6 -66.0(14) . . . . ?
Br2 C1 C5 C6 114.3(11) . . . . ?
O13 C4 C5 C8 59.9(18) . . . . ?
O15 C4 C5 C8 -64.3(19) . . . . ?
C3 C4 C5 C8 179.8(13) . . . . ?
O13 C4 C5 C1 -171.0(11) . . . . ?
O15 C4 C5 C1 64.8(14) . . . . ?
C3 C4 C5 C1 -51.1(12) . . . . ?
O13 C4 C5 C6 -62.6(13) . . . . ?
O15 C4 C5 C6 173.3(12) . . . . ?
C3 C4 C5 C6 57.3(11) . . . . ?
C8 C5 C6 C7 -171.0(11) . . . . ?
C1 C5 C6 C7 58.8(14) . . . . ?
C4 C5 C6 C7 -39.4(13) . . . . ?
C8 C5 C6 C11 56.9(16) . . . . ?
C1 C5 C6 C11 -73.4(14) . . . . ?
C4 C5 C6 C11 -171.6(12) . . . . ?
C11 C6 C7 C3 133.6(13) . . . . ?
C5 C6 C7 C3 6.0(15) . . . . ?
C2 C3 C7 C6 -69.3(14) . . . . ?
C4 C3 C7 C6 30.0(14) . . . . ?
C1 C5 C8 C9 74.3(17) . . . . ?
C4 C5 C8 C9 -166.3(13) . . . . ?
C6 C5 C8 C9 -50.6(17) . . . . ?
C11 C10 C9 C8 -53.9(18) . . . . ?
C5 C8 C9 C10 49.2(17) . . . . ?
C9 C10 C11 O12 177.4(13) . . . . ?
C9 C10 C11 C6 56.2(18) . . . . ?
C7 C6 C11 O12 54.3(17) . . . . ?
C5 C6 C11 O12 178.6(11) . . . . ?
C7 C6 C11 C10 178.4(12) . . . . ?
C5 C6 C11 C10 -57.3(16) . . . . ?
O13 C4 O15 C16 -62.7(15) . . . . ?
C3 C4 O15 C16 171.7(11) . . . . ?
C5 C4 O15 C16 62.5(16) . . . . ?
O15 C4 O13 C14 -54.4(15) . . . . ?
C3 C4 O13 C14 67.4(16) . . . . ?
C5 C4 O13 C14 175.3(11) . . . . ?
 
_diffrn_measured_fraction_theta_max    0.992
_diffrn_reflns_theta_full              22.54
_diffrn_measured_fraction_theta_full   0.992
_refine_diff_density_max    0.590
_refine_diff_density_min   -0.673
_refine_diff_density_rms    0.151
